# Supplementary material for: miRToolsGallery: a tag-based and rankable microRNA bioinformatics resources database portal
Source: Oxford University Press journal article supplement (doi:10.1093/database/bay004), 2018-01-01
Supplement: bay004_supp_table_1.pdf [file bay004_supp_table_1.pdf]

| Tool Name                              | Latest Publication Year | Publication Count | Total Citation Count | PageRank Score |
|----------------------------------------|-------------------------|-------------------|----------------------|----------------|
| miRBase                                | 2014                    | 8                 | 4903                 | 0.089971711    |
| Rfam                                   | 2015                    | 7                 | 1872                 | 0.083137364    |
| miRanda (microRNA.org)                 | 2010                    | 4                 | 2446                 | 0.051662267    |
| MiRscan                                | 2003                    | 2                 | 597                  | 0.051438779    |
| TargetScan                             | 2015                    | 5                 | 5972                 | 0.050041484    |
| miRNA - Target Gene Prediction at EMBL | 2005                    | 2                 | 850                  | 0.034150576    |
| PicTar                                 | 2006                    | 3                 | 1798                 | 0.031303389    |
| RNAhybrid                              | 2006                    | 2                 | 900                  | 0.02416889     |
| RNAz                                   | 2010                    | 3                 | 334                  | 0.022668872    |
| ViennaRNA                              | 2015                    | 5                 | 1489                 | 0.020935933    |
| DIANA-TarBase                          | 2015                    | 4                 | 650                  | 0.017168313    |
| smiRNAdb                               | 2007                    | 1                 | 1250                 | 0.009220509    |
| PITA                                   | 2007                    | 1                 | 748                  | 0.008658808    |
| miRDeep                                | 2012                    | 2                 | 638                  | 0.008112443    |
| miRecords                              | 2009                    | 1                 | 407                  | 0.007540016    |
| DIANA-microT                           | 2013                    | 4                 | 438                  | 0.007082146    |
| Bowtie                                 | 2009                    | 1                 | 5634                 | 0.006218964    |
| targetrank                             | 2007                    | 1                 | 133                  | 0.006041816    |
| fRNAdb                                 | 2009                    | 2                 | 115                  | 0.005964958    |
| NONCODE                                | 2016                    | 6                 | 350                  | 0.005773178    |
| miRTarBase                             | 2016                    | 3                 | 613                  | 0.005501763    |
| TargetFinder                           | 2010                    | 3                 | 897                  | 0.005360648    |
| miRDB                                  | 2016                    | 5                 | 497                  | 0.005254933    |
| Transterm                              | 2009                    | 2                 | 44                   | 0.004951214    |
| miR2Disease                            | 2009                    | 1                 | 293                  | 0.004900643    |
| miRNAMap                               | 2008                    | 2                 | 156                  | 0.004852097    |
| SOAP                                   | 2009                    | 2                 | 1641                 | 0.004766136    |
| RNAxs                                  | 2008                    | 1                 | 86                   | 0.004758056    |
| EIMMo                                  | 2007                    | 1                 | 126                  | 0.004478044    |
| RNA22                                  | 2012                    | 2                 | 575                  | 0.004433506    |
| DIANA-miRGen                           | 2016                    | 3                 | 159                  | 0.004336136    |
| starBase                               | 2014                    | 3                 | 377                  | 0.004274154    |

|                                |      |   |      |             |
|--------------------------------|------|---|------|-------------|
| CMfinder                       | 2006 | 1 | 118  | 0.004117806 |
| Maq                            | 2008 | 1 | 1105 | 0.003933423 |
| ExoCarta                       | 2016 | 4 | 403  | 0.003866034 |
| miRanalyzer                    | 2011 | 2 | 174  | 0.003501209 |
| RNAdb                          | 2007 | 2 | 116  | 0.003412174 |
| miRGator                       | 2013 | 3 | 114  | 0.003241712 |
| SEQanswers                     | 2012 | 2 | 31   | 0.002792323 |
| PED                            | 2014 | 3 | 25   | 0.002792323 |
| miRU                           | 2005 | 1 | 105  | 0.002728874 |
| MicroInspector                 | 2005 | 1 | 82   | 0.002697088 |
| mirWIP                         | 2008 | 1 | 93   | 0.002633642 |
| HMDD                           | 2014 | 2 | 278  | 0.002608325 |
| DIANA-miRPath                  | 2015 | 3 | 364  | 0.002572806 |
| MPSS                           | 2007 | 4 | 284  | 0.002519719 |
| cre-siRNA                      | 2007 | 1 | 146  | 0.002409417 |
| Bioinformatics Links Directory | 2012 | 8 | 46   | 0.002335886 |
| Argonaute                      | 2006 | 1 | 26   | 0.00206589  |
| RNAmicro                       | 2006 | 1 | 58   | 0.002045304 |
| g:Profiler                     | 2016 | 3 | 409  | 0.002026583 |
| ASRP                           | 2008 | 2 | 121  | 0.002024225 |
| AHD                            | 2011 | 2 | 29   | 0.001959525 |
| maizeGDB                       | 2016 | 4 | 100  | 0.001959525 |
| MIMAS                          | 2009 | 2 | 18   | 0.001959525 |
| Laminin database               | 2014 | 2 | 4    | 0.001959525 |
| RNAstructure                   | 2016 | 3 | 300  | 0.001891049 |
| siSearch                       | 2004 | 1 | 36   | 0.001882992 |
| ProMiR                         | 2006 | 2 | 75   | 0.0018442   |
| DIANA-LncBase                  | 2016 | 2 | 75   | 0.001840769 |
| DoRiNA                         | 2015 | 2 | 82   | 0.001823025 |
| BWA                            | 2009 | 1 | 6318 | 0.001805722 |
| RNAplex                        | 2008 | 1 | 58   | 0.001798095 |
| siDirect                       | 2009 | 3 | 96   | 0.001768771 |
| MicroTar                       | 2006 | 1 | 24   | 0.001751575 |

|                        |      |   |     |             |
|------------------------|------|---|-----|-------------|
| mirclust               | 2009 | 1 | 19  | 0.001729239 |
| TransmiR               | 2010 | 1 | 126 | 0.001647864 |
| MIRZA                  | 2013 | 1 | 42  | 0.001618446 |
| SnoReport              | 2008 | 1 | 52  | 0.001606366 |
| NPInter                | 2016 | 3 | 43  | 0.001586757 |
| mirnasvm               | 2005 | 1 | 128 | 0.001549892 |
| TargetSpy              | 2010 | 1 | 42  | 0.00148593  |
| miRWalk                | 2015 | 2 | 531 | 0.001454392 |
| MIReNA                 | 2010 | 1 | 45  | 0.001430695 |
| PolymiRTS              | 2014 | 3 | 138 | 0.001410779 |
| psRNATarget            | 2011 | 2 | 377 | 0.001390829 |
| miRmap                 | 2013 | 2 | 43  | 0.001275883 |
| RegRNA                 | 2013 | 2 | 109 | 0.001270065 |
| miRSel                 | 2010 | 1 | 27  | 0.001252158 |
| Antar                  | 2011 | 1 | 31  | 0.001245782 |
| MicroMUMMIE            | 2013 | 1 | 16  | 0.001236781 |
| SVMicrO                | 2010 | 1 | 24  | 0.001230716 |
| MIRZA-G                | 2015 | 1 | 7   | 0.001204228 |
| Sfold                  | 2014 | 4 | 166 | 0.001192462 |
| miPred                 | 2007 | 1 | 138 | 0.001190947 |
| deep_sequencing        | 2010 | 1 | 56  | 0.001145903 |
| MBSTAR                 | 2015 | 1 | 1   | 0.001144634 |
| mirTools               | 2013 | 2 | 61  | 0.001141264 |
| TargetBoost            | 2005 | 1 | 31  | 0.001128818 |
| GenMiR++               | 2007 | 1 | 155 | 0.001128775 |
| deepBase               | 2016 | 3 | 75  | 0.001128144 |
| PhenomiR               | 2012 | 2 | 71  | 0.001123091 |
| siRecords              | 2009 | 2 | 23  | 0.001111082 |
| MiRAlign               | 2005 | 1 | 83  | 0.001101067 |
| siRNA Selection Server | 2004 | 1 | 99  | 0.001096035 |
| cellHTS                | 2010 | 2 | 120 | 0.001084918 |
| miRExpress             | 2009 | 1 | 75  | 0.001081914 |
| GenomeRNAi             | 2013 | 3 | 72  | 0.001077387 |

|                                                          |      |   |     |             |
|----------------------------------------------------------|------|---|-----|-------------|
| SigTerms                                                 | 2008 | 1 | 60  | 0.001053198 |
| miR-abela                                                | 2005 | 1 | 85  | 0.001048874 |
| FlyRNAi                                                  | 2012 | 2 | 58  | 0.001045286 |
| DEQOR                                                    | 2004 | 1 | 48  | 0.001033327 |
| miTarget                                                 | 2006 | 1 | 61  | 0.001033012 |
| MAGIA                                                    | 2012 | 2 | 82  | 0.00102064  |
| NBmiRTar                                                 | 2007 | 1 | 36  | 0.001009295 |
| CircuitsDB                                               | 2011 | 2 | 51  | 0.000987094 |
| LNCipedia                                                | 2015 | 3 | 154 | 0.000956451 |
| TSGene                                                   | 2016 | 2 | 127 | 0.000948225 |
| IntaRNA                                                  | 2014 | 2 | 146 | 0.000910714 |
| SeqBuster                                                | 2016 | 3 | 49  | 0.000905051 |
| DIANA-mirExTra                                           | 2016 | 2 | 34  | 0.000888233 |
| UEA sRNA toolkit                                         | 2008 | 1 | 102 | 0.000883002 |
| E-RNAi                                                   | 2010 | 2 | 57  | 0.000873285 |
| PARalyzer                                                | 2011 | 1 | 101 | 0.000868462 |
| miRNASNP                                                 | 2015 | 2 | 91  | 0.000867229 |
| ChIPBase                                                 | 2017 | 2 | 90  | 0.000858838 |
| miRNAkey                                                 | 2010 | 1 | 32  | 0.000854994 |
| DSAP                                                     | 2010 | 1 | 32  | 0.000850161 |
| HuSiDa                                                   | 2005 | 1 | 11  | 0.000844581 |
| UCbase & miRfunc                                         | 2009 | 1 | 14  | 0.000833195 |
| MMIA                                                     | 2009 | 1 | 67  | 0.000816827 |
| TargetMiner                                              | 2009 | 1 | 57  | 0.000816052 |
| De Novo SVM Classification of Precursor MicroRNAs        | 2007 | 1 | 65  | 0.000815543 |
| miRo                                                     | 2009 | 1 | 38  | 0.000809363 |
| soybean_mirna                                            | 2010 | 1 | 42  | 0.000793091 |
| More complete gene silencing by fewer siRNAs             | 2007 | 1 | 19  | 0.000784818 |
| Reliable prediction of Drosha processing sites in miRNAs | 2007 | 1 | 36  | 0.000782614 |
| GraphWeb                                                 | 2008 | 1 | 30  | 0.000772926 |
| MISIM                                                    | 2010 | 1 | 43  | 0.000767196 |
| PMRD                                                     | 2010 | 1 | 79  | 0.000766493 |
| miRCancer                                                | 2013 | 1 | 55  | 0.000763491 |

|                                     |      |   |     |             |
|-------------------------------------|------|---|-----|-------------|
| EVpedia                             | 2015 | 1 | 31  | 0.000763376 |
| DSIR                                | 2006 | 1 | 76  | 0.000753954 |
| CluePedia                           | 2013 | 1 | 67  | 0.000749171 |
| piRNABank                           | 2008 | 1 | 88  | 0.000748742 |
| microPred                           | 2009 | 1 | 57  | 0.00073854  |
| MicroSNIper                         | 2010 | 1 | 43  | 0.000732759 |
| FAME                                | 2010 | 1 | 35  | 0.000721531 |
| CORNA                               | 2009 | 1 | 25  | 0.000720431 |
| PASS                                | 2009 | 1 | 51  | 0.000719285 |
| miREnvironment                      | 2011 | 1 | 19  | 0.000717858 |
| SoyKB                               | 2014 | 2 | 37  | 0.000716406 |
| GeneSet2miRNA                       | 2009 | 1 | 21  | 0.000704152 |
| HLungDB                             | 2010 | 1 | 18  | 0.000700334 |
| Patrocles                           | 2010 | 2 | 71  | 0.000697493 |
| GenScript                           | 2004 | 1 | 20  | 0.000687716 |
| miRNA SNIper                        | 2013 | 2 | 26  | 0.000685373 |
| segemehl                            | 2009 | 1 | 148 | 0.000684077 |
| Web MicroRNA Designer               | 2008 | 2 | 391 | 0.000683857 |
| SNMNMF                              | 2011 | 1 | 53  | 0.000675759 |
| miRDeep*                            | 2013 | 1 | 36  | 0.000673926 |
| Empirical GO                        | 2015 | 1 | 21  | 0.000670187 |
| SignaLink                           | 2013 | 2 | 50  | 0.000658752 |
| miRNA Body Map                      | 2011 | 1 | 34  | 0.000657761 |
| miRNAPath                           | 2007 | 1 | 12  | 0.000656481 |
| siDRM                               | 2008 | 1 | 10  | 0.000655322 |
| SHRiMP                              | 2011 | 2 | 304 | 0.0006494   |
| RNAither                            | 2009 | 1 | 25  | 0.000649394 |
| Tomato Functional Genomics Database | 2011 | 2 | 57  | 0.000644766 |
| PatMaN                              | 2008 | 1 | 61  | 0.000644216 |
| FLIGHT                              | 2010 | 2 | 20  | 0.000642736 |
| mirConnX                            | 2011 | 1 | 49  | 0.000635813 |
| miRGate                             | 2017 | 2 | 10  | 0.000632329 |
| dChip-GemINI                        | 2012 | 1 | 27  | 0.000629021 |

|                        |      |   |     |             |
|------------------------|------|---|-----|-------------|
| miTALOS                | 2016 | 2 | 19  | 0.000622995 |
| sIR                    | 2007 | 1 | 10  | 0.000614949 |
| TAM                    | 2010 | 1 | 42  | 0.000612001 |
| SiteSifter             | 2010 | 2 | 221 | 0.000608367 |
| MiRPara                | 2011 | 1 | 35  | 0.000605501 |
| OligoWalk              | 2010 | 2 | 20  | 0.000603467 |
| miRTar                 | 2011 | 1 | 29  | 0.000600169 |
| YM500                  | 2017 | 3 | 28  | 0.000597438 |
| dbDEMC                 | 2017 | 2 | 26  | 0.000593095 |
| SomamiR                | 2016 | 2 | 21  | 0.000592964 |
| ShortStack             | 2016 | 2 | 38  | 0.000591686 |
| miR2Subpath            | 2012 | 1 | 14  | 0.000591325 |
| omiRas                 | 2013 | 1 | 21  | 0.000590314 |
| miRCode                | 2012 | 1 | 64  | 0.000589993 |
| GeneCodis              | 2012 | 3 | 336 | 0.000588679 |
| ncRNAdb                | 2007 | 1 | 18  | 0.000581193 |
| SM2miR                 | 2013 | 1 | 19  | 0.000574136 |
| TSmiR                  | 2014 | 1 | 26  | 0.00056837  |
| MeT-DB                 | 2015 | 1 | 7   | 0.000563196 |
| Chipster               | 2011 | 1 | 66  | 0.000562101 |
| lncRNASNP              | 2015 | 1 | 26  | 0.000561755 |
| NCG                    | 2016 | 5 | 83  | 0.000561745 |
| CPSS                   | 2017 | 2 | 15  | 0.000558782 |
| isomiRex               | 2013 | 1 | 12  | 0.000557739 |
| CleaveLand             | 2009 | 1 | 125 | 0.000557712 |
| novoMiRank             | 2016 | 1 | 4   | 0.00055626  |
| Database of isomirs    | 2010 | 1 | 104 | 0.000553792 |
| The UEA sRNA workbench | 2017 | 3 | 72  | 0.00054947  |
| siRNA Design Software  | 2005 | 1 | 18  | 0.000548998 |
| siRNArules             | 2006 | 1 | 10  | 0.000548688 |
| TAPIR                  | 2010 | 1 | 49  | 0.000548461 |
| miRdSNP                | 2012 | 1 | 41  | 0.000547501 |
| DARIO                  | 2011 | 1 | 20  | 0.000547456 |

|                                             |      |   |     |             |
|---------------------------------------------|------|---|-----|-------------|
| CAP-miRSeq                                  | 2014 | 1 | 25  | 0.000545244 |
| MGD/MGI                                     | 2015 | 3 | 167 | 0.000543922 |
| HCS-Analyzer                                | 2012 | 1 | 4   | 0.000543768 |
| BreastMark                                  | 2013 | 1 | 32  | 0.000543768 |
| GeneSeer                                    | 2005 | 1 | 4   | 0.000543768 |
| miRDeep-P                                   | 2011 | 1 | 54  | 0.000540364 |
| MirSNP                                      | 2012 | 1 | 55  | 0.000539543 |
| CSRDB                                       | 2007 | 1 | 39  | 0.000538804 |
| miRNAMiner                                  | 2008 | 1 | 21  | 0.000536796 |
| NEXT-RNAi                                   | 2010 | 1 | 24  | 0.000527909 |
| PNRD                                        | 2015 | 1 | 18  | 0.000519641 |
| MiRFinder                                   | 2007 | 1 | 29  | 0.000517437 |
| miRNEST                                     | 2014 | 2 | 17  | 0.000516488 |
| TFmiR                                       | 2015 | 1 | 12  | 0.000514865 |
| PIPmiR                                      | 2012 | 1 | 38  | 0.000513327 |
| CID-miRNA                                   | 2008 | 1 | 21  | 0.000512076 |
| LSD                                         | 2014 | 2 | 18  | 0.000511118 |
| RCoS                                        | 2009 | 1 | 64  | 0.000510598 |
| piRNA                                       | 2009 | 1 | 21  | 0.000509234 |
| mirEX                                       | 2015 | 2 | 17  | 0.000504784 |
| mirDIP                                      | 2011 | 1 | 66  | 0.000503904 |
| A personalized microRNA microarray normaliz | 2010 | 1 | 11  | 0.000502128 |
| LoessM                                      | 2009 | 1 | 20  | 0.000502128 |
| miREval                                     | 2013 | 2 | 20  | 0.000501025 |
| MIR@NT@N                                    | 2011 | 1 | 28  | 0.000500513 |
| RNAiDB                                      | 2004 | 1 | 29  | 0.000495086 |
| Linc2GO                                     | 2013 | 1 | 23  | 0.000489613 |
| AgiMicroRna                                 | 2011 | 1 | 46  | 0.000484062 |
| VIRmiRNA                                    | 2014 | 1 | 12  | 0.000483589 |
| MatureBayes                                 | 2010 | 1 | 26  | 0.000475151 |
| BRB-ArrayTools                              | 2008 | 1 | 22  | 0.000472973 |
| mirna-corpora                               | 2014 | 1 | 8   | 0.000472239 |
| miRTarCLIP                                  | 2013 | 1 | 15  | 0.000470509 |

|                                           |      |   |     |             |
|-------------------------------------------|------|---|-----|-------------|
| miROrtho                                  | 2009 | 1 | 29  | 0.000469726 |
| PETfold & PETcofold                       | 2011 | 4 | 48  | 0.000469206 |
| wapRNA                                    | 2011 | 1 | 20  | 0.000469136 |
| miRSystem                                 | 2012 | 1 | 51  | 0.000467117 |
| workflow of integrating mRNA and miRNA ex | 2011 | 1 | 11  | 0.000460488 |
| CancerMiner                               | 2013 | 1 | 49  | 0.000460332 |
| siDesign                                  | 2009 | 1 | 20  | 0.00045994  |
| TargetRNA                                 | 2014 | 2 | 79  | 0.000458784 |
| miRvar                                    | 2011 | 1 | 11  | 0.000457318 |
| IsomiRage                                 | 2014 | 1 | 15  | 0.000457129 |
| miRDeathDB                                | 2012 | 1 | 7   | 0.000456715 |
| miRRim                                    | 2007 | 1 | 23  | 0.000454718 |
| PhaseTank                                 | 2015 | 1 | 4   | 0.00045454  |
| HHMMiR                                    | 2009 | 1 | 25  | 0.000454482 |
| SyStemCell                                | 2012 | 1 | 4   | 0.000454242 |
| Lasso_miR                                 | 2011 | 1 | 35  | 0.000451632 |
| SiDE                                      | 2005 | 1 | 10  | 0.000451611 |
| SoymiRNet                                 | 2014 | 1 | 10  | 0.000450526 |
| rice_build                                | 2008 | 1 | 115 | 0.0004504   |
| miren                                     | 2012 | 1 | 17  | 0.000449607 |
| miRBase Tracker                           | 2014 | 1 | 25  | 0.000448653 |
| MIREAP                                    | 2015 | 2 | 25  | 0.000448486 |
| miTEA                                     | 2013 | 1 | 13  | 0.000447402 |
| Chimira                                   | 2015 | 1 | 10  | 0.000446231 |
| MiClip                                    | 2014 | 1 | 8   | 0.000444279 |
| PROmiRNA                                  | 2013 | 1 | 21  | 0.000441277 |
| iMir                                      | 2013 | 1 | 15  | 0.000438871 |
| miRDeepFinder                             | 2012 | 1 | 87  | 0.000438322 |
| multiMiR                                  | 2014 | 1 | 19  | 0.000436686 |
| PuTmiR                                    | 2010 | 1 | 15  | 0.000434332 |
| FatiGO +                                  | 2007 | 1 | 102 | 0.000433836 |
| miRge                                     | 2015 | 1 | 7   | 0.00043134  |
| MirZ                                      | 2009 | 1 | 35  | 0.00043017  |



|                                                  |      |   |     |             |
|--------------------------------------------------|------|---|-----|-------------|
| CRSD                                             | 2006 | 1 | 22  | 0.000427176 |
| SSCprofiler                                      | 2009 | 1 | 18  | 0.000422962 |
| miRNAFold                                        | 2016 | 2 | 12  | 0.000422837 |
| microTSS                                         | 2014 | 1 | 13  | 0.000422752 |
| sRNAtoolbox                                      | 2015 | 1 | 23  | 0.000421799 |
| dsCheck                                          | 2005 | 1 | 35  | 0.000420856 |
| mirAct                                           | 2011 | 1 | 11  | 0.00042062  |
| isomiRID                                         | 2013 | 1 | 7   | 0.000419392 |
| OncomiRDB                                        | 2014 | 1 | 18  | 0.000419302 |
| SpecificityServer                                | 2008 | 1 | 6   | 0.000419217 |
| AsiDesigner                                      | 2010 | 2 | 5   | 0.000419217 |
| PASmiR                                           | 2013 | 1 | 9   | 0.000418848 |
| MonarchBase                                      | 2013 | 1 | 15  | 0.000418848 |
| Database of cattle candidate genes and genetic r | 2009 | 1 | 28  | 0.000418848 |
| PHDcleav                                         | 2013 | 1 | 8   | 0.000418848 |
| sMBPLS                                           | 2012 | 1 | 19  | 0.000418848 |
| miRiadne                                         | 2015 | 1 | 1   | 0.000418848 |
| NetAge                                           | 2010 | 1 | 21  | 0.000418848 |
| miRNA timeline                                   | 2012 | 1 | 18  | 0.000416354 |
| TMREC                                            | 2015 | 1 | 3   | 0.000416194 |
| ComiR                                            | 2013 | 2 | 45  | 0.000415748 |
| AthaMap                                          | 2014 | 3 | 39  | 0.000415632 |
| mirPub                                           | 2015 | 1 | 4   | 0.000415422 |
| miR-host                                         | 2013 | 1 | 18  | 0.000415174 |
| REA                                              | 2013 | 1 | 4   | 0.000415067 |
| SMiR-NBI                                         | 2016 | 2 | 101 | 0.000413965 |
| PmmR                                             | 2011 | 1 | 5   | 0.000412747 |
| miRHrt                                           | 2010 | 1 | 9   | 0.000411998 |
| mimiRNA                                          | 2010 | 1 | 29  | 0.000411686 |
| STarMir                                          | 2016 | 2 | 17  | 0.000411532 |
| CoGemiR                                          | 2008 | 1 | 11  | 0.000406988 |
| miRFANs                                          | 2012 | 1 | 3   | 0.000406221 |
| deepBlockAlign                                   | 2012 | 1 | 9   | 0.000405663 |

|                       |      |   |    |             |
|-----------------------|------|---|----|-------------|
| Target-align          | 2010 | 1 | 21 | 0.000403842 |
| FANTOM4 EdgeExpressDB | 2009 | 1 | 27 | 0.000403789 |
| SeqTrimMap            | 2012 | 1 | 11 | 0.000401533 |
| FlaiMapper            | 2015 | 1 | 5  | 0.000399741 |
| shortran              | 2012 | 1 | 5  | 0.000399525 |
| PmiRKB                | 2011 | 1 | 12 | 0.000399056 |
| SAVoR                 | 2012 | 1 | 7  | 0.000397957 |
| MaturePred            | 2011 | 1 | 16 | 0.000397059 |
| MiRdup                | 2013 | 1 | 11 | 0.00039549  |
| mrSNP                 | 2014 | 1 | 13 | 0.000395476 |
| TALASSO               | 2012 | 1 | 19 | 0.00039319  |
| CoRAL                 | 2014 | 2 | 9  | 0.000392603 |
| SFGD                  | 2014 | 1 | 10 | 0.00039208  |
| GraP                  | 2015 | 1 | 5  | 0.00039208  |
| DisTMGneT             | 2013 | 1 | 9  | 0.000391354 |
| RIsearch              | 2012 | 1 | 17 | 0.000389498 |
| mirsnpscore           | 2011 | 1 | 25 | 0.000389249 |
| TargetScore           | 2014 | 1 | 7  | 0.000388612 |
| PlantMiRNAPred        | 2011 | 1 | 18 | 0.000387816 |
| UTRdb and UTRsite     | 2010 | 1 | 92 | 0.000387741 |
| siRNAdb               | 2005 | 1 | 13 | 0.000387321 |
| miRT                  | 2012 | 1 | 8  | 0.000386902 |
| HuntMi                | 2013 | 1 | 11 | 0.000386324 |
| mirMark               | 2014 | 1 | 6  | 0.000386208 |
| HOCTARdb              | 2011 | 1 | 16 | 0.000385401 |
| dbSMR                 | 2009 | 1 | 20 | 0.000385152 |
| miRtest               | 2012 | 1 | 10 | 0.000384984 |
| ceRDB                 | 2012 | 1 | 20 | 0.000383628 |
| ppt-miRBase           | 2011 | 1 | 7  | 0.000382934 |
| ExprTargetDB          | 2010 | 1 | 36 | 0.000381081 |
| RNAcentral            | 2017 | 3 | 47 | 0.000380572 |
| MiRank                | 2008 | 1 | 20 | 0.000379764 |
| rSNPBase              | 2014 | 1 | 20 | 0.000379374 |

|                                                |      |   |    |             |
|------------------------------------------------|------|---|----|-------------|
| MTide                                          | 2015 | 1 | 10 | 0.000379101 |
| DAS                                            | 2005 | 1 | 5  | 0.000377209 |
| miSolRNA                                       | 2010 | 1 | 1  | 0.000377209 |
| RPdb                                           | 2015 | 1 | 1  | 0.000377209 |
| KUPKB                                          | 2012 | 1 | 9  | 0.000377209 |
| CellMiner                                      | 2012 | 1 | 98 | 0.000377209 |
| miRandola                                      | 2012 | 1 | 52 | 0.000376073 |
| MiRmat                                         | 2012 | 1 | 7  | 0.000375835 |
| SylArray                                       | 2010 | 1 | 18 | 0.000374811 |
| miRSponge                                      | 2015 | 1 | 9  | 0.000374433 |
| ISMARA                                         | 2014 | 1 | 41 | 0.000372667 |
| SeedSeq                                        | 2013 | 1 | 1  | 0.000372667 |
| Pharmaco-miRs                                  | 2014 | 1 | 15 | 0.000372172 |
| miRTex                                         | 2015 | 1 | 6  | 0.000372161 |
| miR-BAG                                        | 2012 | 1 | 4  | 0.000371262 |
| miRTrail                                       | 2012 | 1 | 12 | 0.000371238 |
| A combinatorial approach to determine the cont | 2009 | 1 | 2  | 0.000370858 |
| ExcellmiRDB                                    | 2015 | 1 | 1  | 0.000370593 |
| self-containment index calculation             | 2008 | 1 | 9  | 0.000369903 |
| miRegulome                                     | 2015 | 1 | 4  | 0.000369645 |
| sPARTA                                         | 2014 | 1 | 10 | 0.000369212 |
| PEMDAM                                         | 2014 | 1 | 7  | 0.000369141 |
| PAREsnip                                       | 2012 | 1 | 30 | 0.000368645 |
| miREvo                                         | 2012 | 1 | 30 | 0.000367851 |
| mRTP                                           | 2007 | 1 | 12 | 0.000367258 |
| miRNACon                                       | 2014 | 1 | 18 | 0.000366028 |
| miRror-Suite                                   | 2014 | 3 | 20 | 0.000364918 |
| MicroPC                                        | 2009 | 1 | 8  | 0.000364226 |
| Circ2Traits                                    | 2013 | 1 | 29 | 0.000363754 |
| miRiam                                         | 2010 | 1 | 15 | 0.000363382 |
| cWords                                         | 2013 | 1 | 6  | 0.000363329 |
| miRMAP (Visualization)                         | 2014 | 1 | 6  | 0.000361978 |
| miRFam                                         | 2011 | 1 | 9  | 0.000361742 |

|                            |      |   |    |             |
|----------------------------|------|---|----|-------------|
| E-miR                      | 2010 | 1 | 31 | 0.000361608 |
| Vir-Mir db                 | 2008 | 1 | 25 | 0.000360848 |
| CCDB                       | 2011 | 1 | 20 | 0.000360553 |
| Oasis                      | 2015 | 1 | 4  | 0.000359958 |
| dPORE                      | 2011 | 1 | 13 | 0.000359898 |
| microTranspoGene           | 2008 | 1 | 33 | 0.000359843 |
| SoMART                     | 2012 | 1 | 22 | 0.000359209 |
| miRMaid                    | 2010 | 1 | 6  | 0.000359143 |
| GAMUT                      | 2014 | 1 | 3  | 0.000358332 |
| ISRNA                      | 2014 | 1 | 5  | 0.000357014 |
| RFRCDB-siRNA               | 2007 | 1 | 11 | 0.000356389 |
| RPASuite                   | 2015 | 1 | 4  | 0.000356389 |
| AltAnalyze and DomainGraph | 2010 | 1 | 80 | 0.000356389 |
| BioVLAB-MMIA-NGS           | 2015 | 1 | 4  | 0.000356132 |
| miRspring                  | 2013 | 1 | 7  | 0.00035592  |
| ncRNAimprint               | 2010 | 1 | 14 | 0.000355714 |
| TissueAtlas                | 2016 | 2 | 23 | 0.000354131 |
| Xenbase                    | 2015 | 2 | 43 | 0.000354131 |
| HDMP                       | 2013 | 1 | 23 | 0.000353967 |
| tasiRNadb                  | 2014 | 1 | 7  | 0.000353713 |
| RISCbinder                 | 2009 | 1 | 14 | 0.000353266 |
| MapMi                      | 2010 | 1 | 22 | 0.000353125 |
| targetHub                  | 2013 | 1 | 4  | 0.000352919 |
| cGRNB                      | 2013 | 1 | 3  | 0.00035256  |
| PsRobot                    | 2012 | 1 | 49 | 0.000352175 |
| SmiRN-AD                   | 2014 | 1 | 6  | 0.000349878 |
| Mirsynergy                 | 2014 | 1 | 12 | 0.000349629 |
| HMED                       | 2014 | 1 | 7  | 0.000348399 |
| MultiMiTar                 | 2011 | 1 | 11 | 0.000348005 |
| DeAnnIso                   | 2016 | 1 | 2  | 0.000347871 |
| MIRPIPE                    | 2014 | 1 | 6  | 0.000347871 |
| LncRBase                   | 2014 | 1 | 7  | 0.000347587 |
| M@IA                       | 2008 | 1 | 4  | 0.000347108 |

|                           |      |   |     |             |
|---------------------------|------|---|-----|-------------|
| ViTa                      | 2007 | 1 | 27  | 0.000346693 |
| MAGI                      | 2014 | 1 | 3   | 0.000344923 |
| miR2GO                    | 2015 | 1 | 4   | 0.000344634 |
| NorahDesk                 | 2012 | 1 | 4   | 0.00034411  |
| DualTargeting             | 2010 | 1 | 7   | 0.000343897 |
| RNAimmuno                 | 2012 | 1 | 11  | 0.000343897 |
| microPIR                  | 2014 | 2 | 14  | 0.000343833 |
| mdgsa                     | 2016 | 1 | 3   | 0.000342112 |
| CMP                       | 2011 | 1 | 10  | 0.00034175  |
| vHoT                      | 2012 | 1 | 6   | 0.000340373 |
| Discriminant              | 2014 | 1 | 8   | 0.000339787 |
| NOVOMIR                   | 2010 | 1 | 5   | 0.000339663 |
| mrsFAST                   | 2014 | 2 | 111 | 0.000339619 |
| miRNA-regulome            | 2015 | 1 | 3   | 0.000339501 |
| miR-isomiRExp             | 2016 | 1 | 9   | 0.000339354 |
| miRIAD                    | 2014 | 1 | 10  | 0.000339039 |
| MiRonTop                  | 2010 | 1 | 17  | 0.000338593 |
| PMTED                     | 2013 | 1 | 7   | 0.000338098 |
| p-TAREF                   | 2011 | 1 | 7   | 0.000337842 |
| eRNA                      | 2014 | 1 | 8   | 0.000337803 |
| ViRBase                   | 2015 | 1 | 18  | 0.000337304 |
| TAREF                     | 2010 | 1 | 10  | 0.000337153 |
| TUMIR                     | 2013 | 1 | 3   | 0.000337118 |
| S-MED                     | 2010 | 1 | 28  | 0.000336077 |
| TargetCompare             | 2014 | 1 | 3   | 0.000335569 |
| GREENC                    | 2016 | 1 | 7   | 0.000335569 |
| MVDA                      | 2015 | 1 | 4   | 0.000335569 |
| CANTATAdb                 | 2016 | 1 | 4   | 0.000335569 |
| miRiaD (Text Mining Tool) | 2016 | 1 | 1   | 0.000335569 |
| MiRTif                    | 2008 | 1 | 21  | 0.000335222 |
| mirnaTA                   | 2014 | 1 | 3   | 0.000334553 |
| PMirP                     | 2010 | 1 | 9   | 0.000334205 |
| tfmirloop                 | 2012 | 1 | 7   | 0.000333674 |

|                                            |      |   |    |             |
|--------------------------------------------|------|---|----|-------------|
| CyTargetLinker                             | 2013 | 1 | 16 | 0.000333045 |
| SITPR                                      | 2014 | 1 | 10 | 0.000333045 |
| Small RNA Workbench                        | 2013 | 1 | 6  | 0.00033285  |
| miRvestigator                              | 2011 | 1 | 15 | 0.000332539 |
| HeteroMirPred                              | 2013 | 1 | 10 | 0.000332517 |
| rip                                        | 2010 | 1 | 10 | 0.000331912 |
| Comparative Sequencing of Plant Small RNAs | 2014 | 2 | 39 | 0.00032962  |
| MIPS PlantsDB                              | 2013 | 2 | 63 | 0.00032962  |
| piRNA cluster database                     | 2016 | 1 | 4  | 0.00032962  |
| HPVbase                                    | 2015 | 1 | 6  | 0.00032962  |
| siRNAmoD                                   | 2016 | 1 | 4  | 0.00032962  |
| Lists2Networks                             | 2010 | 1 | 25 | 0.00032962  |
| BraMRs                                     | 2012 | 1 | 12 | 0.00032962  |
| miR-PREFeR                                 | 2014 | 1 | 10 | 0.00032962  |
| CHNmiRD                                    | 2016 | 1 | 4  | 0.00032962  |
| DISMIRA                                    | 2015 | 1 | 3  | 0.00032962  |
| recit                                      | 2009 | 1 | 7  | 0.000329261 |
| Psmir                                      | 2016 | 1 | 2  | 0.000329116 |
| miRTarVis                                  | 2015 | 1 | 2  | 0.000328247 |
| lncRNAMap                                  | 2014 | 1 | 7  | 0.000328035 |
| microT-ANN                                 | 2011 | 1 | 5  | 0.000326938 |
| mESAdb                                     | 2011 | 1 | 5  | 0.000326934 |
| ncPRO-seq                                  | 2012 | 1 | 20 | 0.000326265 |
| mirExplorer                                | 2011 | 1 | 9  | 0.000326246 |
| rnaanalys                                  | 2015 | 2 | 4  | 0.000326105 |
| mircisreg                                  | 2008 | 1 | 4  | 0.000325196 |
| CrossHub                                   | 2016 | 1 | 6  | 0.000325159 |
| MMiRNA-Tar                                 | 2015 | 1 | 2  | 0.000325159 |
| lncCeDB                                    | 2014 | 1 | 16 | 0.000325159 |
| GUUGle                                     | 2006 | 1 | 13 | 0.000324026 |
| mirna_target                               | 2010 | 1 | 10 | 0.000324007 |
| treebic                                    | 2011 | 1 | 2  | 0.0003219   |
| mirTarPri                                  | 2013 | 1 | 3  | 0.000321689 |

|                                 |      |   |    |             |
|---------------------------------|------|---|----|-------------|
| miRNA-SNiPer                    | 2015 | 1 | 3  | 0.000321689 |
| ZooMir                          | 2010 | 1 | 19 | 0.000321689 |
| ncRNAClassifier                 | 2012 | 1 | 4  | 0.000321619 |
| Bioinformatics Resource Manager | 2012 | 2 | 26 | 0.000321234 |
| miRD                            | 2011 | 1 | 7  | 0.00032116  |
| RepTar                          | 2011 | 1 | 14 | 0.000320941 |
| APADB                           | 2014 | 1 | 8  | 0.000320803 |
| ActMiR                          | 2016 | 1 | 5  | 0.000320462 |
| ToppMiR                         | 2014 | 1 | 5  | 0.000319145 |
| GrapeMiRNA                      | 2009 | 1 | 2  | 0.000319015 |
| RBP-Var                         | 2016 | 1 | 1  | 0.000318913 |
| RMBase                          | 2016 | 1 | 10 | 0.000318913 |
| MiRduplexSVM                    | 2015 | 1 | 3  | 0.000318913 |
| miRNAPrediction                 | 2012 | 1 | 4  | 0.000318913 |
| ifmda                           | 2016 | 1 | 31 | 0.000316641 |
| isomiR-SEA                      | 2016 | 1 | 1  | 0.000316641 |
| miRPlant                        | 2014 | 1 | 9  | 0.000316641 |
| ProMISe                         | 2014 | 1 | 13 | 0.000316641 |
| StarScan                        | 2015 | 1 | 4  | 0.000316641 |
| FARNA                           | 2017 | 1 | 2  | 0.000316641 |
| miRNeye                         | 2010 | 1 | 59 | 0.000316081 |
| miReg                           | 2010 | 1 | 3  | 0.000314875 |
| miRIdentify                     | 2014 | 1 | 4  | 0.000314749 |
| PlantMirnaT                     | 2015 | 1 | 3  | 0.000314749 |
| miRHiC                          | 2013 | 1 | 1  | 0.000314749 |
| NRDR                            | 2012 | 1 | 5  | 0.000314749 |
| HomoTarget                      | 2013 | 1 | 4  | 0.000314749 |
| RandA                           | 2012 | 1 | 5  | 0.000314653 |
| miRPD                           | 2014 | 1 | 14 | 0.000313941 |
| tsmti                           | 2014 | 1 | 5  | 0.000313938 |
| Screensaver                     | 2010 | 1 | 12 | 0.000313147 |
| MiRNA GO Annotation Manual      | 2016 | 1 | 3  | 0.000312957 |
| sRNAMap                         | 2009 | 1 | 29 | 0.000312957 |

|               |      |   |    |             |
|---------------|------|---|----|-------------|
| Cupid         | 2015 | 1 | 14 | 0.000312596 |
| Pan-ceRNADB   | 2015 | 1 | 13 | 0.000312596 |
| Geoseq        | 2010 | 1 | 3  | 0.000312108 |
| PARma         | 2013 | 1 | 13 | 0.000311774 |
| miReader      | 2013 | 1 | 5  | 0.000311774 |
| SolmiRNA      | 2011 | 1 | 11 | 0.000311774 |
| miRTour       | 2011 | 1 | 4  | 0.000311774 |
| CLIPSeqTools  | 2016 | 1 | 5  | 0.000311774 |
| Mirinho       | 2015 | 1 | 1  | 0.000311044 |
| miRBoost      | 2015 | 1 | 2  | 0.000311044 |
| HNOCDDB       | 2012 | 1 | 5  | 0.000310585 |
| mirSOM        | 2011 | 1 | 8  | 0.000310585 |
| HOCCLUS2      | 2014 | 1 | 9  | 0.000310585 |
| MIDP          | 2015 | 1 | 7  | 0.000310585 |
| MISIS         | 2016 | 2 | 7  | 0.000310585 |
| miRTCat       | 2013 | 1 | 6  | 0.000310254 |
| iMcRNA        | 2015 | 1 | 43 | 0.000309544 |
| miRNA-dis     | 2015 | 1 | 14 | 0.000309544 |
| targetS       | 2014 | 1 | 7  | 0.000309544 |
| iMiRNA-PseDPC | 2016 | 1 | 27 | 0.000309544 |
| miRNA-deKmer  | 2015 | 1 | 25 | 0.000309544 |
| MNDR          | 2013 | 1 | 21 | 0.000309544 |
| SplamiR       | 2011 | 1 | 2  | 0.000309209 |
| myMIR         | 2011 | 1 | 8  | 0.00030832  |
| EpimiR        | 2014 | 1 | 5  | 0.000307809 |
| ERISdb        | 2013 | 1 | 9  | 0.000306472 |
| iSRAP         | 2015 | 1 | 2  | 0.000306421 |
| miRModule     | 2015 | 1 | 2  | 0.000306421 |
| PROGmiR       | 2012 | 1 | 9  | 0.00030602  |
| SurvMicro     | 2014 | 1 | 9  | 0.00030602  |
| DASHR         | 2016 | 1 | 3  | 0.00030602  |
| CancerNet     | 2015 | 1 | 2  | 0.00030602  |
| miSEA         | 2015 | 1 | 2  | 0.000305826 |



|                    |      |   |    |             |
|--------------------|------|---|----|-------------|
| Omics Pipe         | 2015 | 1 | 13 | 0.000305826 |
| MirID              | 2013 | 1 | 2  | 0.000305285 |
| Raccess            | 2011 | 1 | 13 | 0.000302257 |
| HumanViCe          | 2014 | 1 | 2  | 0.000293929 |
| ComiRNet           | 2015 | 1 | 1  | 0.000293929 |
| miRLAB             | 2015 | 1 | 2  | 0.000293929 |
| EvoRSR             | 2009 | 1 | 0  | 0.000293929 |
| MiRComb            | 2016 | 1 | 1  | 0.000293929 |
| GeneACT            | 2006 | 1 | 7  | 0.000293929 |
| miR2Gene           | 2011 | 1 | 5  | 0.000293929 |
| BCmicrO            | 2012 | 1 | 5  | 0.000293929 |
| MiRNATIP           | 2016 | 1 | 0  | 0.000293929 |
| SIPHT              | 2008 | 1 | 62 | 0.000293929 |
| PerM               | 2009 | 1 | 36 | 0.000293929 |
| mirCoX             | 2013 | 1 | 2  | 0.000293929 |
| plantDARIO         | 2014 | 1 | 2  | 0.000293929 |
| VetBioBase         | 2014 | 1 | 4  | 0.000293929 |
| hLGDB              | 2013 | 1 | 4  | 0.000293929 |
| TMMN               | 2015 | 1 | 4  | 0.000293929 |
| Miracle            | 2016 | 1 | 1  | 0.000293929 |
| LimiTT             | 2016 | 1 | 0  | 0.000293929 |
| sydSeq             | 2015 | 1 | 1  | 0.000293929 |
| ARN (Adipogenesis) | 2016 | 2 | 0  | 0.000293929 |
| SoyFN              | 2014 | 1 | 1  | 0.000293929 |
| BCIP               | 2017 | 1 | 0  | 0.000293929 |
| CyTRANSFINDER      | 2016 | 1 | 1  | 0.000293929 |
| isomiR-Benchmark   | 2017 | 1 | 0  | 0.000293929 |
| FARE-CAFE          | 2015 | 1 | 1  | 0.000293929 |
| PDbase             | 2009 | 1 | 2  | 0.000293929 |
| PGS                | 2014 | 1 | 2  | 0.000293929 |
| CSCdb              | 2016 | 1 | 0  | 0.000293929 |
| MITHrIL            | 2016 | 1 | 0  | 0.000293929 |
| SparseMFEFold      | 2016 | 1 | 0  | 0.000293929 |

|                                                 |      |   |    |             |
|-------------------------------------------------|------|---|----|-------------|
| TargetExpress                                   | 2016 | 1 | 2  | 0.000293929 |
| PmiRExAt                                        | 2016 | 1 | 0  | 0.000293929 |
| LNCediting                                      | 2017 | 1 | 2  | 0.000293929 |
| ODIN-bc2015-miRNA                               | 2017 | 1 | 0  | 0.000293929 |
| mirMeta                                         | 2016 | 1 | 0  | 0.000293929 |
| PC-TraFF                                        | 2015 | 1 | 2  | 0.000293929 |
| UP-TORR                                         | 2013 | 1 | 17 | 0.000293929 |
| ncPred                                          | 2014 | 1 | 5  | 0.000293929 |
| miRAS                                           | 2007 | 1 | 1  | 0.000293929 |
| miR-Synth                                       | 2014 | 1 | 4  | 0.000293929 |
| expmicro                                        | 2010 | 1 | 5  | 0.000293929 |
| isomiR2Function                                 | 2017 | 1 | 0  | 0.000293929 |
| SZGR                                            | 2010 | 1 | 42 | 0.000293929 |
| SpidermiR                                       | 2017 | 1 | 0  | 0.000293929 |
| RiboSubstrates                                  | 2006 | 1 | 6  | 0.000293929 |
| MixMir                                          | 2014 | 1 | 4  | 0.000293929 |
| GeneHub-GEPIS                                   | 2007 | 1 | 11 | 0.000293929 |
| MiRAuto                                         | 2013 | 1 | 0  | 0.000293929 |
| miARma-Seq                                      | 2016 | 1 | 4  | 0.000293929 |
| GEAR                                            | 2017 | 1 | 0  | 0.000293929 |
| XTalkDB                                         | 2017 | 1 | 0  | 0.000293929 |
| unitas                                          | 2017 | 1 | 0  | 0.000293929 |
| miRCluster                                      | 2012 | 1 | 2  | 0.000293929 |
| CircNet                                         | 2016 | 1 | 11 | 0.000293929 |
| A web-based bioinformatics interface applied to | 2012 | 1 | 10 | 0.000293929 |
| ProteoMirExpress                                | 2013 | 1 | 0  | 0.000293929 |
| ProNet                                          | 2010 | 1 | 14 | 0.000293929 |
| PsRNA                                           | 2010 | 1 | 1  | 0.000293929 |
| CSZ                                             | 2014 | 1 | 5  | 0.000293929 |
| miRanalyze                                      | 2017 | 1 | 0  | 0.000293929 |
| Tailor                                          | 2015 | 1 | 3  | 0.000293929 |
| MirGeneDB                                       | 2015 | 1 | 23 | 0.000293929 |
| IntNetLncSim                                    | 2016 | 1 | 3  | 0.000293929 |

|                            |      |   |     |             |
|----------------------------|------|---|-----|-------------|
| MirAncestar                | 2017 | 1 | 0   | 0.000293929 |
| Avishkar                   | 2015 | 1 | 2   | 0.000293929 |
| ChroMoS                    | 2013 | 1 | 16  | 0.000293929 |
| LBSizeCleav                | 2016 | 1 | 2   | 0.000293929 |
| DsTRD                      | 2016 | 1 | 2   | 0.000293929 |
| miRPathDB                  | 2017 | 1 | 3   | 0.000293929 |
| SNPinfo                    | 2009 | 1 | 194 | 0.000293929 |
| Infinity                   | 2016 | 1 | 1   | 0.000293929 |
| RDMAS                      | 2006 | 1 | 15  | 0.000293929 |
| PEpiD                      | 2013 | 1 | 5   | 0.000293929 |
| Ginger Est                 | 2015 | 1 | 0   | 0.000293929 |
| ncRNA-DB                   | 2014 | 1 | 4   | 0.000293929 |
| AtmiRNET                   | 2015 | 1 | 4   | 0.000293929 |
| Orchidstra                 | 2017 | 2 | 10  | 0.000293929 |
| ptRNApred                  | 2014 | 1 | 1   | 0.000293929 |
| fat_deposition             | 2013 | 1 | 11  | 0.000293929 |
| ImiRP                      | 2016 | 1 | 1   | 0.000293929 |
| Ortho2ExpressMatrix        | 2011 | 1 | 1   | 0.000293929 |
| GBM-BioDP                  | 2014 | 1 | 15  | 0.000293929 |
| Pancreatic Cancer Database | 2014 | 1 | 10  | 0.000293929 |
| MagiCMicroRna              | 2015 | 1 | 1   | 0.000293929 |
| RNAi Codex                 | 2006 | 1 | 17  | 0.000293929 |
| ccNET                      | 2017 | 1 | 3   | 0.000293929 |
| GenomeTraFac               | 2007 | 1 | 13  | 0.000293929 |
| microRNAviewer             | 2012 | 1 | 17  | 0.000293929 |
| ChiloDB                    | 2014 | 1 | 3   | 0.000293929 |
| canEvolve                  | 2013 | 1 | 10  | 0.000293929 |
| Exo-miRExplorer            | 2017 | 1 | 1   | 0.000293929 |
| CellBase                   | 2012 | 1 | 11  | 0.000293929 |
| CREAM                      | 2014 | 1 | 1   | 0.000293929 |
| NSDNA                      | 2017 | 1 | 0   | 0.000293929 |
| miRsig                     | 2017 | 1 | 1   | 0.000293929 |
| ViralmiR                   | 2015 | 1 | 1   | 0.000293929 |

|                                               |      |   |    |             |
|-----------------------------------------------|------|---|----|-------------|
| MysiRNA-designer                              | 2011 | 1 | 7  | 0.000293929 |
| BUFET                                         | 2017 | 1 | 0  | 0.000293929 |
| ARN (Autophagy)                               | 2015 | 1 | 6  | 0.000293929 |
| Pipeline to analyze Illumina reads            | 2011 | 1 | 8  | 0.000293929 |
| SMEpred workbench                             | 2016 | 1 | 1  | 0.000293929 |
| MixDTrees                                     | 2007 | 1 | 5  | 0.000293929 |
| Listerionics                                  | 2017 | 1 | 1  | 0.000293929 |
| PceRBase                                      | 2017 | 1 | 1  | 0.000293929 |
| RIDDLE                                        | 2012 | 1 | 10 | 0.000293929 |
| GPA                                           | 2015 | 1 | 0  | 0.000293929 |
| SEED                                          | 2011 | 1 | 15 | 0.000293929 |
| gbCRC                                         | 2016 | 1 | 1  | 0.000293929 |
| P-SAMS                                        | 2016 | 1 | 3  | 0.000293929 |
| miRVine                                       | 2015 | 1 | 5  | 0.000293929 |
| miRTar2GO                                     | 2017 | 1 | 0  | 0.000293929 |
| SMIRP                                         | 2015 | 1 | 1  | 0.000293929 |
| Structuring osteosarcoma knowledge            | 2014 | 1 | 8  | 0.000293929 |
| ZIKV-CDB                                      | 2016 | 1 | 1  | 0.000293929 |
| netClass                                      | 2014 | 2 | 8  | 0.000293929 |
| miRcomp                                       | 2016 | 1 | 2  | 0.000293929 |
| miREC                                         | 2015 | 1 | 1  | 0.000293929 |
| miRTar Hunter                                 | 2013 | 1 | 2  | 0.000293929 |
| MmPalateMiRNA                                 | 2013 | 1 | 3  | 0.000293929 |
| miRNA_code                                    | 2009 | 1 | 4  | 0.000293929 |
| Automatic learning of pre-miRNAs from differε | 2016 | 1 | 1  | 0.000293929 |
| PCBC                                          | 2017 | 1 | 0  | 0.000293929 |
| DroID                                         | 2011 | 1 | 74 | 0.000293929 |
| miRLocator                                    | 2015 | 1 | 1  | 0.000293929 |
| VARIANT                                       | 2012 | 1 | 22 | 0.000293929 |
| PHANTOM                                       | 2013 | 1 | 5  | 0.000293929 |
| imRNA                                         | 2016 | 1 | 1  | 0.000293929 |
| PeTMbase                                      | 2016 | 1 | 4  | 0.000293929 |
| siVirus                                       | 2006 | 1 | 14 | 0.000293929 |

|                                     |      |   |    |             |
|-------------------------------------|------|---|----|-------------|
| PPImiRFS                            | 2015 | 1 | 1  | 0.000293929 |
| OMICtools                           | 2014 | 1 | 17 | 0.000293929 |
| MtiBase                             | 2015 | 1 | 5  | 0.000293929 |
| SMiRK                               | 2015 | 1 | 0  | 0.000293929 |
| WSNF                                | 2016 | 1 | 0  | 0.000293929 |
| SHARAKU                             | 2016 | 1 | 0  | 0.000293929 |
| BiTargeting                         | 2010 | 1 | 7  | 0.000293929 |
| BCGSC miRNA Profiling Pipeline      | 2016 | 1 | 7  | 0.000293929 |
| iNMF                                | 2016 | 1 | 2  | 0.000293929 |
| MCMG                                | 2013 | 1 | 7  | 0.000293929 |
| PAGED                               | 2012 | 1 | 8  | 0.000293929 |
| GARNET                              | 2011 | 1 | 3  | 0.000293929 |
| rVarBase                            | 2016 | 1 | 6  | 0.000293929 |
| IBRel                               | 2017 | 1 | 0  | 0.000293929 |
| SorghumFDB                          | 2016 | 1 | 2  | 0.000293929 |
| SubpathwayGMir                      | 2015 | 1 | 2  | 0.000293929 |
| miRNA Digger                        | 2016 | 1 | 0  | 0.000293929 |
| miRBShunter                         | 2017 | 1 | 1  | 0.000293929 |
| T-REX                               | 2010 | 1 | 11 | 0.000293929 |
| RScan                               | 2007 | 1 | 1  | 0.000293929 |
| RiceATM                             | 2016 | 1 | 0  | 0.000293929 |
| miRTargetLink                       | 2016 | 1 | 5  | 0.000293929 |
| Ebbie                               | 2006 | 1 | 3  | 0.000293929 |
| MirStress                           | 2013 | 1 | 5  | 0.000293929 |
| SePIA                               | 2016 | 1 | 0  | 0.000293929 |
| BmncRNadb                           | 2016 | 1 | 1  | 0.000293929 |
| rna-wl                              | 2010 | 1 | 1  | 0.000293929 |
| COGERE                              | 2014 | 1 | 4  | 0.000293929 |
| ToppCluster                         | 2010 | 1 | 61 | 0.000293929 |
| Centratliy-based Pathway Enrichment | 2012 | 1 | 13 | 0.000293929 |
| LeARN                               | 2008 | 1 | 7  | 0.000293929 |
| HiTSeekR                            | 2016 | 1 | 0  | 0.000293929 |
| pssRNAMiner                         | 2008 | 1 | 9  | 0.000293929 |

|                   |      |   |    |             |
|-------------------|------|---|----|-------------|
| Seten             | 2017 | 1 | 0  | 0.000293929 |
| miSTAR            | 2017 | 1 | 1  | 0.000293929 |
| BatchGenAna       | 2009 | 1 | 0  | 0.000293929 |
| SBM               | 2008 | 1 | 6  | 0.000293929 |
| OncomiRdbB        | 2014 | 1 | 2  | 0.000293929 |
| TRiP              | 2012 | 1 | 34 | 0.000293929 |
| BBBomics          | 2016 | 1 | 1  | 0.000293929 |
| DMD               | 2015 | 1 | 6  | 0.000293929 |
| BiLTR             | 2015 | 1 | 3  | 0.000293929 |
| si-shRNA Selector | 2010 | 1 | 17 | 0.000293929 |
| SubmiRine         | 2015 | 1 | 1  | 0.000293929 |
| Mi-DISCOVERER     | 2010 | 1 | 0  | 0.000293929 |
| RAIN              | 2017 | 1 | 0  | 0.000293929 |
| DevMouse          | 2014 | 1 | 0  | 0.000293929 |
| STarMirDB         | 2016 | 1 | 0  | 0.000293929 |
| MMiRNA-Viewer     | 2016 | 1 | 0  | 0.000293929 |
| fast-db           | 2007 | 1 | 23 | 0.000293929 |
| MinDist           | 2012 | 1 | 0  | 0.000293929 |
| ReNE              | 2014 | 1 | 3  | 0.000293929 |
| BioM2MetDisease   | 2017 | 1 | 0  | 0.000293929 |
| RAmiRNA           | 2012 | 1 | 0  | 0.000293929 |
| C-mii             | 2012 | 1 | 5  | 0.000293929 |
| RNA-Seq Viewer    | 2017 | 1 | 0  | 0.000293929 |
| miRNALasso        | 2015 | 1 | 3  | 0.000293929 |
| Vicinal           | 2014 | 1 | 5  | 0.000293929 |
| BeadSme           | 2011 | 1 | 5  | 0.000293929 |
| targetrunningsum  | 2015 | 1 | 2  | 0.000293929 |
| GermlncRNA        | 2015 | 1 | 5  | 0.000293929 |
| iSubgraph         | 2013 | 1 | 1  | 0.000293929 |
| miratlas          | 2017 | 1 | 0  | 0.000293929 |
| miRLiN            | 2016 | 1 | 1  | 0.000293929 |
| miRquant          | 2016 | 2 | 19 | 0.000293929 |
| iMiRNA-SSF        | 2016 | 1 | 23 | 0.000293929 |

|                            |      |   |    |             |
|----------------------------|------|---|----|-------------|
| TarPmiR                    | 2016 | 1 | 0  | 0.000293929 |
| MicroLive                  | 2012 | 1 | 2  | 0.000293929 |
| chimiRic                   | 2016 | 1 | 1  | 0.000293929 |
| MiRSEA                     | 2016 | 1 | 0  | 0.000293929 |
| miFRame                    | 2015 | 1 | 1  | 0.000293929 |
| siSPOTR                    | 2013 | 1 | 12 | 0.000293929 |
| MiREN                      | 2016 | 1 | 2  | 0.000293929 |
| mirPRo                     | 2015 | 1 | 1  | 0.000293929 |
| Ssa miRNAs DB              | 2012 | 1 | 3  | 0.000293929 |
| AGD                        | 2009 | 1 | 14 | 0.000293929 |
| MREdictor                  | 2013 | 1 | 7  | 0.000293929 |
| CSmiRTar                   | 2017 | 1 | 0  | 0.000293929 |
| TGRD                       | 2014 | 1 | 10 | 0.000293929 |
| CKDdb                      | 2017 | 1 | 0  | 0.000293929 |
| TriplexRna                 | 2014 | 1 | 8  | 0.000293929 |
| miRMaster                  | 2017 | 1 | 0  | 0.000293929 |
| HTSmix                     | 2011 | 1 | 4  | 0.000293929 |
| AnnoLnc                    | 2016 | 1 | 0  | 0.000293929 |
| RENATO                     | 2012 | 1 | 7  | 0.000293929 |
| ChemiRs                    | 2016 | 1 | 1  | 0.000293929 |
| imiRTP                     | 2012 | 1 | 7  | 0.000293929 |
| plateletomics              | 2014 | 1 | 29 | 0.000293929 |
| SimiRa                     | 2015 | 1 | 2  | 0.000293929 |
| SpecificDB                 | 2007 | 1 | 0  | 0.000293929 |
| miRA                       | 2015 | 1 | 4  | 0.000293929 |
| LMMEL-miR-miner            | 2016 | 1 | 0  | 0.000293929 |
| PMF NETWORK MODEL          | 2016 | 1 | 1  | 0.000293929 |
| pseudoMap                  | 2013 | 1 | 1  | 0.000293929 |
| RCDB                       | 2012 | 1 | 11 | 0.000293929 |
| Antagomirbase              | 2011 | 1 | 1  | 0.000293929 |
| USAGP                      | 2010 | 1 | 25 | 0.000293929 |
| RNA dualPF                 | 2016 | 1 | 1  | 0.000293929 |
| UQAM Wheat microRNA Portal | 2015 | 1 | 2  | 0.000293929 |

|                 |      |   |    |             |
|-----------------|------|---|----|-------------|
| IGDB.NSCLC      | 2012 | 1 | 6  | 0.000293929 |
| Cepred          | 2009 | 1 | 19 | 0.000293929 |
| OvMark          | 2014 | 1 | 3  | 0.000293929 |
| MD-SeeGH        | 2008 | 1 | 16 | 0.000293929 |
| miRMOD          | 2015 | 1 | 0  | 0.000293929 |
| VAN             | 2013 | 1 | 0  | 0.000293929 |
| contextMMIA     | 2017 | 1 | 0  | 0.000293929 |
| RNALOSS         | 2005 | 1 | 5  | 0.000293929 |
| iDeep           | 2017 | 1 | 0  | 0.000293929 |
| miRSeq          | 2014 | 1 | 5  | 0.000293929 |
| SAMMate         | 2011 | 1 | 27 | 0.000293929 |
| TTS mapping     | 2009 | 1 | 9  | 0.000293929 |
| ENViz           | 2015 | 1 | 1  | 0.000293929 |
| SbachHTS        | 2013 | 1 | 1  | 0.000293929 |
| C2Analyzer      | 2014 | 1 | 0  | 0.000293929 |
| CARD            | 2016 | 1 | 2  | 0.000293929 |
| IntmiR          | 2011 | 1 | 0  | 0.000293929 |
| ptrguide        | 2012 | 1 | 4  | 0.000293929 |
| QuickMIRSeq     | 2017 | 1 | 0  | 0.000293929 |
| SpermBase       | 2016 | 1 | 0  | 0.000293929 |
| genYsis Toolbox | 2013 | 1 | 1  | 0.000293929 |
| RNA-CODE        | 2013 | 1 | 4  | 0.000293929 |
| POSTAR          | 2017 | 1 | 0  | 0.000293929 |
| miRNAsong       | 2016 | 1 | 1  | 0.000293929 |
| spongeScan      | 2016 | 1 | 3  | 0.000293929 |
| mythology       | 2015 | 1 | 3  | 0.000293929 |
| CircInteractome | 2016 | 1 | 10 | 0.000293929 |
| MIRNA-DISTILLER | 2011 | 1 | 0  | 0.000293929 |
| ExiMiR          | 2014 | 1 | 1  | 0.000293929 |
| mirdba          | 2013 | 1 | 3  | 0.000293929 |
| RegNetwork      | 2015 | 1 | 12 | 0.000293929 |
| GiSAO.db        | 2011 | 1 | 0  | 0.000293929 |
| T2DiACoD        | 2017 | 1 | 0  | 0.000293929 |



|                                            |      |   |    |             |
|--------------------------------------------|------|---|----|-------------|
| H-RVM                                      | 2013 | 1 | 1  | 0.000293929 |
| miEAA                                      | 2016 | 1 | 3  | 0.000293929 |
| OCDB                                       | 2015 | 1 | 0  | 0.000293929 |
| PACCMIT/PACCMIT-CDS                        | 2015 | 1 | 1  | 0.000293929 |
| CrossLink                                  | 2006 | 1 | 0  | 0.000293929 |
| miREE                                      | 2011 | 1 | 3  | 0.000293929 |
| TPS                                        | 2017 | 1 | 1  | 0.000293929 |
| mBISON                                     | 2015 | 1 | 0  | 0.000293929 |
| UTRome.org                                 | 2008 | 1 | 10 | 0.000293929 |
| BioProfiling                               | 2011 | 1 | 40 | 0.000293929 |
| miR-EdiTAr                                 | 2012 | 1 | 6  | 0.000293929 |
| miRNet                                     | 2016 | 1 | 4  | 0.000293929 |
| icTAIR                                     | 2017 | 1 | 0  | 0.000293929 |
| miRVaS                                     | 2016 | 1 | 3  | 0.000293929 |
| ATARiS                                     | 2013 | 1 | 47 | 0           |
| ed_scan                                    | 2003 | 1 | 6  | 0           |
| mirtronPred                                | 2012 | 1 | 9  | 0           |
| RespCanDB                                  | 2017 | 1 | 0  | 0           |
| PlantcircBase                              | 2017 | 1 | 2  | 0           |
| miR_Path                                   | 2015 | 1 | 5  | 0           |
| SIM                                        | 2016 | 1 | 1  | 0           |
| MSbind                                     | 2014 | 1 | 1  | 0           |
| MicRooN                                    | 2015 | 1 | 0  | 0           |
| BioVLAB-MMIA                               | 2012 | 1 | 4  | 0           |
| PHMMTSs                                    | 2005 | 1 | 9  | 0           |
| YamiPred                                   | 2015 | 1 | 0  | 0           |
| 1-CMDb                                     | 2017 | 1 | 0  | 0           |
| miRmine                                    | 2017 | 1 | 1  | 0           |
| OmniSearch                                 | 2016 | 1 | 2  | 0           |
| MicroTarget                                | 2017 | 1 | 0  | 0           |
| Tools4miRs                                 | 2016 | 1 | 0  | 0           |
| TopKLists                                  | 2015 | 1 | 1  | 0           |
| Functional interpretation of microRNA-mRNA | 2014 | 1 | 0  | 0           |

|                                 |      |   |    |   |
|---------------------------------|------|---|----|---|
| PheLiM                          | 2017 | 1 | 0  | 0 |
| DSTHO                           | 2006 | 1 | 2  | 0 |
| miRQuest                        | 2016 | 1 | 0  | 0 |
| CePa                            | 2013 | 1 | 4  | 0 |
| Exp. Verified microRNA-Target   | 2013 | 1 | 2  | 0 |
| DynaMod                         | 2010 | 1 | 4  | 0 |
| Greglist                        | 2008 | 1 | 19 | 0 |
| ShrinkBayes                     | 2014 | 1 | 2  | 0 |
| GenoSkyline                     | 2016 | 1 | 8  | 0 |
| mirnaDetect                     | 2013 | 1 | 3  | 0 |
| MotifMap-RNA                    | 2017 | 1 | 0  | 0 |
| GO-Elite                        | 2012 | 1 | 67 | 0 |
| deepboost                       | 2017 | 1 | 0  | 0 |
| OligoFaktory                    | 2006 | 1 | 5  | 0 |
| EGs                             | 2008 | 1 | 0  | 0 |
| FMIGS                           | 2017 | 1 | 0  | 0 |
| ORCA                            | 2015 | 1 | 0  | 0 |
| BiCliques Merging               | 2016 | 1 | 0  | 0 |
| TmiRUSite and TmiROSite scripts | 2014 | 1 | 1  | 0 |
| miRNAmeConverter                | 2017 | 1 | 1  | 0 |
| MDTE DB                         | 2015 | 1 | 0  | 0 |
| MiRTDL                          | 2016 | 1 | 0  | 0 |
| PACdb                           | 2010 | 1 | 29 | 0 |
| RDDpred                         | 2016 | 1 | 2  | 0 |
| birta                           | 2012 | 1 | 11 | 0 |
| microDoR                        | 2012 | 1 | 4  | 0 |
| SCLC                            | 2016 | 1 | 6  | 0 |
| MicroRazerS                     | 2010 | 1 | 14 | 0 |
| DINGO                           | 2015 | 1 | 4  | 0 |
| iBFE                            | 2015 | 1 | 0  | 0 |
| ARTS                            | 2006 | 2 | 47 | 0 |
| miMsg                           | 2013 | 1 | 0  | 0 |
| NRSE                            | 2006 | 1 | 2  | 0 |

|                                             |      |   |    |   |
|---------------------------------------------|------|---|----|---|
| IDT SciTools                                | 2008 | 1 | 38 | 0 |
| SARS                                        | 2013 | 1 | 1  | 0 |
| MetaMirClust                                | 2016 | 1 | 1  | 0 |
| G-DOC                                       | 2013 | 1 | 2  | 0 |
| sRNATarget                                  | 2008 | 1 | 12 | 0 |
| MIRAGAA                                     | 2010 | 1 | 7  | 0 |
| NqA                                         | 2014 | 1 | 2  | 0 |
| msgl                                        | 2014 | 1 | 1  | 0 |
| PACRAT                                      | 2003 | 1 | 2  | 0 |
| MLSeq                                       | 2017 | 1 | 0  | 0 |
| miXGENE                                     | 2015 | 1 | 2  | 0 |
| comTAR                                      | 2014 | 1 | 1  | 0 |
| mirSTP                                      | 2017 | 1 | 0  | 0 |
| miRprimer                                   | 2014 | 1 | 14 | 0 |
| ESPSearch                                   | 2005 | 1 | 2  | 0 |
| miRNA_Targets                               | 2012 | 1 | 10 | 0 |
| miRAFinder and GeneAFinder scripts          | 2014 | 1 | 0  | 0 |
| miRseqViewer                                | 2015 | 1 | 0  | 0 |
| miTRATA                                     | 2016 | 1 | 4  | 0 |
| START                                       | 2006 | 1 | 2  | 0 |
| OfftargetFinder                             | 2016 | 1 | 1  | 0 |
| lncRInter                                   | 2017 | 1 | 0  | 0 |
| The Porcine Translational Research Database | 2017 | 1 | 0  | 0 |
| NanoStringNorm                              | 2012 | 1 | 39 | 0 |
| findr                                       | 2017 | 1 | 0  | 0 |
| Semirna                                     | 2012 | 1 | 2  | 0 |
| miRandb                                     | 2017 | 1 | 0  | 0 |
| OmicKriging                                 | 2014 | 1 | 13 | 0 |
| MicroTrout                                  | 2016 | 1 | 1  | 0 |
| dChip                                       | 2011 | 1 | 4  | 0 |
| RiceChip                                    | 2010 | 1 | 0  | 0 |
| MicroSyn                                    | 2011 | 1 | 11 | 0 |
| Wormnet                                     | 2014 | 2 | 9  | 0 |

|                                             |      |   |    |   |
|---------------------------------------------|------|---|----|---|
| CoMoFinder                                  | 2015 | 1 | 1  | 0 |
| dbPHCC                                      | 2016 | 1 | 0  | 0 |
| GEISHA                                      | 2007 | 2 | 30 | 0 |
| AraPath                                     | 2012 | 1 | 7  | 0 |
| QuickMap                                    | 2009 | 1 | 18 | 0 |
| DiseaseConnect                              | 2014 | 1 | 16 | 0 |
| PGnet                                       | 2009 | 1 | 4  | 0 |
| miRNA-Analyzer                              | 2016 | 1 | 0  | 0 |
| biRte                                       | 2015 | 1 | 3  | 0 |
| SNPLogic                                    | 2009 | 1 | 14 | 0 |
| TF--miRNA                                   | 2016 | 1 | 0  | 0 |
| SignaFish                                   | 2016 | 1 | 0  | 0 |
| miRTarVis+                                  | 2017 | 1 | 0  | 0 |
| GAMDB                                       | 2016 | 1 | 2  | 0 |
| LncEnvironmentDB                            | 2014 | 1 | 1  | 0 |
| PD map                                      | 2014 | 1 | 26 | 0 |
| PlanTE-MIR DB                               | 2016 | 1 | 2  | 0 |
| New support vector machine-based method for | 2014 | 1 | 1  | 0 |
| AmphiEST                                    | 2010 | 1 | 1  | 0 |
| InCroMAP                                    | 2013 | 2 | 3  | 0 |
| miRDis                                      | 2017 | 1 | 0  | 0 |
| RNAComposer                                 | 2016 | 1 | 3  | 0 |
| AmiRNA Designer                             | 2016 | 1 | 1  | 0 |
| NoiseMaker                                  | 2010 | 1 | 2  | 0 |
| Pseudo-3D Clustering                        | 2016 | 1 | 0  | 0 |
| BCCTBbp                                     | 2015 | 1 | 3  | 0 |
| webFOG                                      | 2010 | 1 | 0  | 0 |
| FMIMS                                       | 2016 | 1 | 0  | 0 |
| activeMiRNA                                 | 2013 | 1 | 3  | 0 |
| LiverCancerMarkerRIF                        | 2014 | 1 | 2  | 0 |
| miRNA-ensemble                              | 2017 | 1 | 0  | 0 |
| Loregic                                     | 2015 | 1 | 1  | 0 |
| miRPursuit                                  | 2017 | 1 | 0  | 0 |

|              |      |   |    |   |
|--------------|------|---|----|---|
| rnaworkbench | 2008 | 1 | 1  | 0 |
| miRpower     | 2016 | 1 | 2  | 0 |
| Carnation DB | 2014 | 1 | 5  | 0 |
| MULSEA       | 2016 | 1 | 0  | 0 |
| UFFizi       | 2010 | 1 | 1  | 0 |
| GeneFriends  | 2015 | 1 | 13 | 0 |
| ParSel       | 2017 | 1 | 0  | 0 |
| EDMRP        | 2014 | 1 | 1  | 0 |
| MiRE         | 2008 | 1 | 0  | 0 |
| miRNAfe      | 2015 | 1 | 3  | 0 |
| deepSOM      | 2016 | 1 | 0  | 0 |
| iJRF         | 2017 | 1 | 0  | 0 |
| OligoMatcher | 2006 | 1 | 0  | 0 |
| mirnanalyze  | 2017 | 1 | 0  | 0 |
| At_miRNA     | 2013 | 1 | 6  | 0 |
| MirPlex      | 2013 | 1 | 3  | 0 |
| mTD          | 2017 | 2 | 0  | 0 |
| miRUPnet     | 2012 | 1 | 3  | 0 |
| MTDB         | 2010 | 1 | 7  | 0 |
| IsomiR Bank  | 2016 | 1 | 0  | 0 |
| miRClassify  | 2014 | 1 | 17 | 0 |
| miRTP        | 2010 | 1 | 2  | 0 |
| SlideBase    | 2016 | 1 | 0  | 0 |
| ncRNAppi     | 2009 | 1 | 0  | 0 |
| plantMirP    | 2016 | 1 | 0  | 0 |
| miRSeqNovel  | 2012 | 1 | 4  | 0 |
| ImmunemiR    | 2017 | 2 | 0  | 0 |
| JBCB         | 2010 | 1 | 7  | 0 |
| MirCompare   | 2016 | 1 | 2  | 0 |
| iBeetle-Base | 2015 | 1 | 15 | 0 |
| iSmaRT       | 2017 | 1 | 0  | 0 |
| Mirin        | 2014 | 1 | 1  | 0 |
| BosFinder    | 2014 | 1 | 0  | 0 |

|                                              |      |   |    |   |
|----------------------------------------------|------|---|----|---|
| DREAM                                        | 2015 | 1 | 3  | 0 |
| SNPeffect and PupaSuite                      | 2008 | 1 | 26 | 0 |
| PlaMoM                                       | 2017 | 1 | 1  | 0 |
| siRNAs with high specificity to the target   | 2008 | 1 | 2  | 0 |
| EpimiRBase                                   | 2016 | 1 | 2  | 0 |
| Radiogenomics                                | 2015 | 1 | 8  | 0 |
| application in consensus ranking of microRNA | 2013 | 1 | 0  | 0 |
| MethHC                                       | 2015 | 1 | 28 | 0 |
| CHRONOS                                      | 2016 | 1 | 2  | 0 |
| pirnaPre                                     | 2016 | 1 | 0  | 0 |
| iScreen                                      | 2015 | 1 | 0  | 0 |
| FREM                                         | 2016 | 1 | 0  | 0 |
| TROD                                         | 2004 | 1 | 4  | 0 |
| GED                                          | 2017 | 1 | 0  | 0 |
| HCCNet                                       | 2010 | 1 | 7  | 0 |
