# Supplementary material for: miRToolsGallery: a tag-based and rankable microRNA bioinformatics resources database portal
Source: Database (Oxford). 2018 Feb 19;2018:bay004. doi: 10.1093/database/bay004 (PMC5819725; doi:10.1093/database/bay004)
Supplement: Supplementary Table 2 [file bay004_supp_table_2.xlsx]

## Sheet: Supplementary 2
Journal	miRNA Tool Publication Count
Nucleic acids research	313
Bioinformatics	182
BMC bioinformatics	103
PloS one	66
BMC genomics	40
Database	38
Scientific reports	25
RNA	24
Genome biology	16
Methods in molecular biology	16
Bioinformation	12
PLoS computational biology	12
RNA biology	12
IEEE/ACM transactions on computational biology and bioinformatics	11
Briefings in bioinformatics	9
BMC systems biology	8
BMC research notes	7
Genome research	7
BMC plant biology	6
Computers in biology and medicine	6
Molecular bioSystems	6
Nature methods	6
Oncotarget	6
Frontiers in genetics	5
Genomics, proteomics & bioinformatics	5
Algorithms for molecular biology	4
Biochemical and biophysical research communications	4
Cell	4
Genomics	4
Journal of bioinformatics and computational biology	4
Methods	4
Plant & cell physiology	4
Animal genetics	3
BioMed research international	3
Computational biology and chemistry	3
FEBS letters	3
Frontiers in bioengineering and biotechnology	3
Genetics and molecular research	3
Human mutation	3
Nature biotechnology	3
Nature communications	3
Omics	3
PLoS biology	3
Source code for biology and medicine	3
Acta biochimica Polonica	2
Bio Systems	2
Biochimica et biophysica acta	2
BioData mining	2
BMC medical genomics	2
Cell death & disease	2
Computer methods and programs in biomedicine	2
eLife	2
Frontiers in plant science	2
Functional & integrative genomics	2
International journal of molecular sciences	2
Journal of biomedical informatics	2
Journal of biomedical semantics	2
Journal of clinical bioinformatics	2
Journal of computational biology	2
Journal of extracellular vesicles	2
Journal of genetics and genomics = Yi chuan xue bao	2
Journal of genomics	2
Journal of integrative bioinformatics	2
Journal of nucleic acids	2
Journal of virological methods	2
Molecular cancer	2
Molecules and cells	2
Molekuliarnaia biologiia	2
Nature genetics	2
Nature structural & molecular biology	2
Pacific Symposium on Biocomputing	2
Proceedings of the National Academy of Sciences of USA	2
The Plant cell	2
The Plant journal	2
Acta biochimica et biophysica Sinica	1
Advances in experimental medicine and biology	1
AMIA Joint Summits on Translational Science proceedings	1
Amino acids	1
Analytical biochemistry	1
Annual review of genetics	1
Applied bioinformatics	1
Archives of virology	1
Artificial intelligence in medicine	1
Autophagy	1
Biogerontology	1
Biology of reproduction	1
BioTechniques	1
Blood	1
Blood cancer journal	1
BMC immunology	1
BMC medical genetics	1
BMC proceedings	1
Breast cancer research	1
Breast cancer research and treatment	1
Cancer biology & therapy	1
Cancer journal	1
Cancer research	1
Cell cycle	1
Cell death and differentiation	1
Cell proliferation	1
Cell research	1
Cell systems	1
Chinese medical sciences journal	1
Clinical chemistry	1
Cold Spring Harbor symposia on quantitative biology	1
Comparative biochemistry and physiology. Part D, Genomics & proteomics	1
Current biology	1
Current protocols in bioinformatics	1
Cytogenetic and genome research	1
Development (Cambridge, England)	1
DNA research	1
EURASIP journal on bioinformatics & systems biology	1
F1000Research	1
FASEB journal	1
Fly	1
Frontiers in microbiology	1
Frontiers in neuroscience	1
Frontiers in physiology	1
G3 (Bethesda, Md.)	1
Gene	1
Gene therapy	1
Genes & development	1
Genetic epidemiology	1
Genetics	1
Genetics and molecular biology	1
Genome	1
GigaScience	1
IEEE transactions on nanobioscience	1
In silico biology	1
International journal of biological macromolecules	1
International journal of plant genomics	1
Journal of biomolecular screening	1
Journal of biomolecular structure & dynamics	1
Journal of biosciences	1
Journal of biotechnology	1
Journal of cancer research and therapeutics	1
Journal of experimental zoology. Part B, Molecular and developmental evolution	1
Journal of molecular biology	1
Journal of RNAi and gene silencing	1
Journal of the National Cancer Institute	1
Journal of the Royal Society, Interface	1
Journal of theoretical biology	1
Journal of translational medicine	1
Laboratory investigation	1
Mammalian genome	1
Marine genomics	1
Medical & biological engineering & computing	1
Microarrays	1
MicroRNA	1
Molecular & cellular proteomics	1
Molecular and cellular probes	1
Molecular cell	1
Molecular diversity	1
Molecular genetics & genomic medicine	1
Molecular informatics	1
Molecular neurobiology	1
Molecular plant	1
Molecular psychiatry	1
mSystems	1
Nature	1
Oncogenesis	1
Oral oncology	1
PeerJ	1
Pharmacogenetics and genomics	1
Plant molecular biology	1
Plant physiology	1
PLoS genetics	1
PLoS neglected tropical diseases	1
Poultry science	1
Proteomics	1
Public health genomics	1
Science	1
Science China. Life sciences	1
Scientific data	1
Silence	1
Source journal of genomics	1
Statistical applications in genetics and molecular biology	1
Trends in genetics	1
Zebrafish	1
